# Supplementary material for: The Prevalence and Clinical Characteristics of TECTA-Associated Autosomal Dominant Hearing Loss
Source: MDPI journal article supplement (doi:10.3390/genes10100744), 2019-09-24
Supplement: s1 [file s1]

1

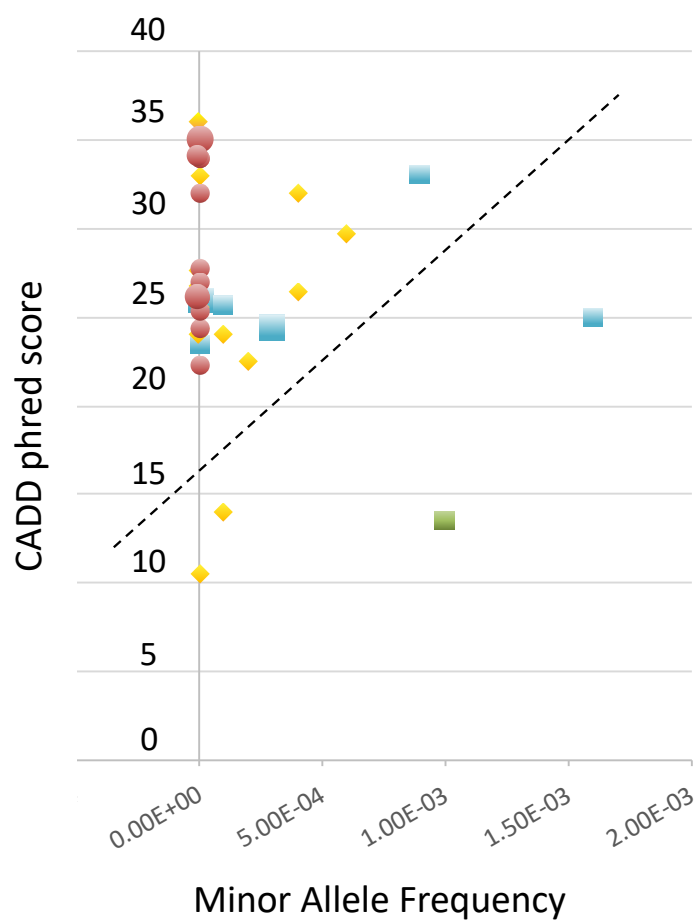

2

3 **Figure S1.** Scatter plot of each identified variant's CADD score and higher MAF values in ToMMo 3.5kJPN or  
 4 ExAC0.3. The color of each point corresponds to the interpretation based on the ACMG criteria in Table1. Red  
 5 indicates likely pathogenic variants. Yellow indicates candidate variants classified as VUS identified in this  
 6 study. Blue indicates the VUS variants we removed from the analysis. Green indicates a likely benign variant.  
 7 The dotted-line separates two groups; the putative benign variants with a high MAF and/or low CADD score,  
 8 and the candidate variants with a low MAF and/or high CADD score.

**Table S1.** The 68 target genes for hearing loss.

| Number | Locus Symbol       | Gene Symbol    | Gene ID   | Transcript Variant                           |
|--------|--------------------|----------------|-----------|----------------------------------------------|
| 1      | DFNA1              | <i>DIAPH1</i>  | NM_005219 | NM_001079812                                 |
| 2      | DFNA2              | <i>KCNQ4</i>   | NM_004700 | NM_172163                                    |
| 3      | DFNA2              | <i>GJB3</i>    | NM_024009 | NM_001005752                                 |
| 4      | DFNA3              | <i>GJB6</i>    | NM_006783 | NM_001110219<br>NM_001110220<br>NM_001110221 |
| 5      | DFNA4              | <i>MYH14</i>   | NM_024729 | NM_001145809.<br>NM_001077186                |
| 6      | DFNA5              | <i>DFNA5</i>   | NM_004403 | NM_001127454<br>NM_001127453                 |
| 7      | DFNA6/14/38        | <i>WFS1</i>    | NM_006005 | NM_001145853                                 |
| 8      | DFNA8/12/DFNB21    | <i>TECTA</i>   | NM_005422 | -                                            |
| 9      | DFNA9/31           | <i>COCH</i>    | NM_004086 | NM_001135058                                 |
| 10     | DFNA10             | <i>EYA4</i>    | NM_004100 | NM_172103<br>NM_172105                       |
| 11     | DFNA11/DFNB2/USH1B | <i>MYO7A</i>   | NM_000260 | NM_001127179<br>NM_001127180                 |
| 12     | DFNA13/DFNB53/STL3 | <i>COL11A2</i> | NM_080680 | NM_080679<br>NM_080681<br>NM_001163771       |
| 13     | DFNA15             | <i>POU4F3</i>  | NM_002700 | -                                            |
| 14     | DFNA17             | <i>MYH9</i>    | NM_002473 | -                                            |
| 15     | DFNA20/DFNA26      | <i>ACTG1</i>   | NM_001614 | NM_001199954                                 |
| 16     | DFNA22/DFNB37      | <i>MYO6</i>    | NM_004999 | -                                            |
| 17     | DFNA25             | <i>SLC17A8</i> | NM_139319 | NM_001145288                                 |
| 18     | DFNA28             | <i>GRHL2</i>   | NM_024915 | -                                            |
| 19     | DFNA36/DFNB7/11    | <i>TMC1</i>    | NM_138691 | -                                            |
| 20     | DFNA40             | <i>CRYM</i>    | NM_001888 | NM_001014444                                 |
| 21     | DFNA44             | <i>CCDC50</i>  | NM_178335 | NM_174908                                    |
| 22     | DFNA48             | <i>MYO1A</i>   | NM_005379 | -                                            |

|    |               |                 |              |                                                                                                           |
|----|---------------|-----------------|--------------|-----------------------------------------------------------------------------------------------------------|
| 23 | DFNA50        | <i>MIRN96</i>   |              |                                                                                                           |
| 24 | DFNA51        | <i>TJP2</i>     | NM_001170414 | NM_004817<br>NM_201629<br>NM_001170630<br>NM_001170415<br>NM_001170416                                    |
| 25 | DFNA64        | <i>DIABLO</i>   | NM_019887    | NM_138929                                                                                                 |
| 26 |               | <i>CEACAM16</i> | NM_001039213 | -                                                                                                         |
| 27 | DFNB1/DFNA3   | <i>GJB2</i>     | NM_004004    | -                                                                                                         |
| 28 | DFNB3         | <i>MYO15A</i>   | NM_016239    | -                                                                                                         |
| 29 | DFNB4/Pendred | <i>SLC26A4</i>  | NM_000441    | -                                                                                                         |
| 30 | DFNB6         | <i>TMIE</i>     | NM_147196    | -                                                                                                         |
| 31 | DFNB8/10      | <i>TMPRSS3</i>  | NM_024022    | NM_032405                                                                                                 |
| 32 | DFNB9         | <i>OTOF</i>     | NM_194248    | NM_194322<br>NM_194323<br>NM_004802                                                                       |
| 33 | DFNB12/USH1D  | <i>CDH23</i>    | NM_022124    | NM_001171930<br>NM_001171931<br>NM_001171932<br>NM_001171933<br>NM_001171934<br>NM_001171936<br>NM_052836 |
| 34 | DFNB15/72/95  | <i>GIPC3</i>    | NM_133261    | -                                                                                                         |
| 35 | DFNB16        | <i>STRC</i>     | NM_153700    | -                                                                                                         |
| 36 | DFNB18/USH1C  | <i>USH1C</i>    | NM_153676    | NM_005709                                                                                                 |
| 37 | DFNB22        | <i>OTOA</i>     | NM_144672    | NM_001161683<br>NM_170664                                                                                 |
| 38 | DFNB23/USH1F  | <i>PCDH15</i>   | NM_033056    | NM_001142763<br>NM_001142764<br>NM_001142765<br>NM_001142766                                              |

|    |              |                 |              |                                                              |
|----|--------------|-----------------|--------------|--------------------------------------------------------------|
|    |              |                 |              | NM_001142767                                                 |
|    |              |                 |              | NM_001142769                                                 |
|    |              |                 |              | NM_001142770                                                 |
|    |              |                 |              | NM_001142771                                                 |
|    |              |                 |              | NM_001142772                                                 |
|    |              |                 |              | NM_001142773                                                 |
| 39 | DFNB24       | <i>RDX</i>      | NM_002906    | -                                                            |
| 40 | DFNB25       | <i>GRXCR1</i>   | NM_001080476 | -                                                            |
| 41 | DFNB28       | <i>TRIOBP</i>   | NM_007032    | NM_138632<br>NM_001039141                                    |
| 42 | DFNB29       | <i>CLDN14</i>   | NM_144492    | NM_001146077<br>NM_001146078<br>NM_001146079<br>NM_012130    |
| 43 | DFNB30       | <i>MYO3A</i>    | NM_017433    | -                                                            |
| 44 | DFNB31/USH2D | <i>WHRN</i>     | NM_015404    | NM_001083885<br>NM_001173425                                 |
| 45 | DFNB35       | <i>ESRRB</i>    | NM_004452    | -                                                            |
| 46 | DFNB36       | <i>ESPN</i>     | NM_031475    | -                                                            |
| 47 | DFNB39       | <i>HGF</i>      | NM_000601    | NM_001010931<br>NM_001010932<br>NM_001010933<br>NM_001010934 |
| 48 | DFNB42       | <i>ILDR1</i>    | NM_001199799 | NM_001199800<br>NM_175924                                    |
| 49 | DFNB48       | <i>CIB2</i>     | NM_006383    | NM_001271888<br>NM_001271889                                 |
| 50 | DFNB49       | <i>MARVELD2</i> | NM_001038603 | NM_001244734                                                 |
| 51 | DFNB59       | <i>DFNB59</i>   | NM_001042702 | -                                                            |
| 52 | DFNB61       | <i>SLC26A5</i>  | NM_206883    | NM_001167962                                                 |

|    |           |                 |              |              |
|----|-----------|-----------------|--------------|--------------|
|    |           |                 |              | NM_206884    |
|    |           |                 |              | NM_206885    |
|    |           |                 |              | NM_198999    |
| 53 | DFNB63    | <i>LRTOMT</i>   | NM_001145307 | NM_001145308 |
|    |           |                 |              | NM_001205138 |
|    |           |                 |              | NM_145309    |
| 54 | DFNB66/67 | <i>LHFPL5</i>   | NM_182548    | -            |
| 55 | DFNB70    | <i>PNPT1</i>    | NM_033109    | -            |
| 56 | DFNB74    | <i>MSRB3</i>    | NM_198080    | NM_001031679 |
|    |           |                 |              | NM_001193460 |
|    |           |                 |              | NM_001193461 |
| 57 | DFNB77    | <i>LOXHD1</i>   | NM_144612    | NM_001173129 |
|    |           |                 |              | NM_001145472 |
|    |           |                 |              | NM_001145473 |
| 58 | DFNB79    | <i>TPRN</i>     | NM_001128228 | -            |
| 59 | DFNB82    | <i>GPSM2</i>    | NM_013296    | -            |
| 60 | DFNB84    | <i>PTPRQ</i>    | NM_001145026 | -            |
| 61 | DFNB89    | <i>KARS</i>     | NM_005548    | NM_001130089 |
| 62 | DFNB91    | <i>SERPINB6</i> | NM_004568    | NM_001195291 |
| 63 | DFNB93    | <i>CABP2</i>    | NM_016366    | -            |
| 64 | USH2A     | <i>USH2A</i>    | NM_007123    | NM_206933    |
| 65 | DFNX1     | <i>PRPS1</i>    | NM_002764    | NM_001204402 |
| 66 | DFNX2     | <i>POU3F4</i>   | NM_000307    | -            |
| 67 | DFNX4     | <i>SMPX</i>     | NM_014332    | -            |
| 68 | DFNX6     | <i>COL4A6</i>   | NM_001847    | NM_033641    |
