# Supplementary material for: The Prevalence and Clinical Characteristics of TECTA-Associated Autosomal Dominant Hearing Loss
Source: MDPI journal article supplement (doi:10.3390/genes10100744), 2019-09-24
Supplement: s1 [file s1]

Table S2. The in silico prediction scores for novel variants in this study.

| Sample ID | Base Change | AA Change | Domein       | SIFT         | PP2_<br>HumDiv | PP2_<br>HumVar | LRT          | MutTaster | MutAssessor | FATHMM    | MetaSVM   | LR           |
|-----------|-------------|-----------|--------------|--------------|----------------|----------------|--------------|-----------|-------------|-----------|-----------|--------------|
| SNS5183   | c.208A>G    | p.N70D    |              | D<br>(0.912) | D (0.637)      | D (0.725)      | D<br>(0.843) | D (0.466) | M (0.832)   | D (0.823) | D (0.928) | D<br>(0.912) |
| 4238      | c.494C>T    | p.T165I   | NIDO         | D<br>(0.721) | D (0.764)      | D (0.875)      | D<br>(0.629) | D (0.588) | H (0.944)   | D (0.822) | D (0.950) | D<br>(0.936) |
| 4030      | c.605T>C    | p.L202P   | NIDO         | D<br>(0.912) | D (0.764)      | D (0.749)      | D<br>(0.629) | D (0.810) | H (0.949)   | T (0.739) | D (0.896) | D<br>(0.870) |
| HL2684    | c.1816T>G   | p.C606G   | ZA<br>(TIL1) | T<br>(0.301) | D (0.899)      | D (0.875)      | D<br>(0.843) | D (0.588) | H (0.975)   | D (0.982) | D (0.982) | D<br>(0.994) |
| HL1389    | c.1898G>T   | p.C633F   | ZA<br>(TIL1) | D<br>(0.912) | D (0.899)      | D (0.916)      | D<br>(0.843) | D (0.810) | H (0.990)   | D (0.957) | D (0.992) | D<br>(0.988) |
| HL2875    | c.2087G>A   | p.C696Y   | ZA           | D<br>(0.912) | D (0.899)      | D (0.916)      | D<br>(0.843) | D (0.588) | H (0.941)   | T (0.270) | T (0.711) | T<br>(0.624) |
| 2803      | c.2087G>C   | p.C696S   | ZA           | D<br>(0.912) | D (0.899)      | D (0.875)      | D<br>(0.843) | D (0.588) | H (0.941)   | T (0.266) | T (0.711) | T<br>(0.624) |
| 4238      | c.3043G>A   | p.E1015K  | ZA<br>(TIL2) | D<br>(0.654) | D (0.764)      | D (0.832)      | D<br>(0.843) | D (0.548) | M (0.852)   | D (0.911) | D (0.965) | D<br>(0.959) |
| HL1942    | c.3605C>T   | p.S1202F  | ZA<br>(VWD3) | D<br>(0.506) | P (0.420)      | B (0.409)      | D<br>(0.466) | D (0.343) | N (0.088)   | T (0.606) | T (0.585) | T<br>(0.420) |
| SNS5351   | c.3850C>T   | p.R1284C  | ZA<br>(VWD3) | D<br>(0.446) | P (0.515)      | P (0.443)      | D<br>(0.485) | D (0.462) | M (0.612)   | T (0.379) | T (0.193) | T<br>(0.373) |

|        |           |          |              |              |           |           |              |           |           |           |           |              |
|--------|-----------|----------|--------------|--------------|-----------|-----------|--------------|-----------|-----------|-----------|-----------|--------------|
| HL3514 | c.3850C>T | p.R1284C | ZA<br>(VWD3) | D<br>(0.447) | P (0.515) | P (0.443) | D<br>(0.485) | D (0.462) | M (0.613) | T (0.379) | T (0.193) | T<br>(0.373) |
| 2965   | c.3995G>A | p.C1332Y | ZA           | D<br>(0.721) | D (0.571) | P (0.521) | D<br>(0.843) | D (0.810) | H (0.963) | D (0.838) | D (0.941) | D<br>(0.922) |
| HL0644 | c.4495G>C | p.D1499H | ZA<br>(VWD4) | D<br>(0.912) | D (0.899) | D (0.971) | D<br>(0.843) | D (0.810) | M (0.791) | T (0.787) | D (0.898) | D<br>(0.887) |
| HL0950 | c.5807T>C | p.L1936P | ZP           | T<br>(0.240) | D (0.899) | D (0.916) | D<br>(0.843) | D (0.810) | L (0.520) | D (0.856) | D (0.905) | D<br>(0.909) |
| HL2094 | c.5824T>A | p.Y1942N | ZP           | D<br>(0.912) | D (0.764) | D (0.875) | D<br>(0.843) | D (0.588) | M (0.712) | D (0.841) | D (0.936) | D<br>(0.925) |
| HL0916 | c.5948C>T | p.T1983I | ZP           | D<br>(0.912) | D (0.764) | D (0.875) | D<br>(0.843) | D (0.588) | M (0.758) | D (0.860) | D (0.937) | D<br>(0.936) |
| HL1026 | c.5987T>A | p.I1996N | ZP           | D<br>(0.784) | D (0.764) | D (0.875) | D<br>(0.843) | D (0.588) | M (0.646) | D (0.842) | D (0.932) | D<br>(0.923) |
| HL3056 | c.5999G>T | p.G2000V | ZP           | D<br>(0.531) | D (0.899) | D (0.971) | D<br>(0.843) | D (0.810) | L (0.520) | D (0.950) | D (0.975) | D<br>(0.975) |
| HL2846 | c.6183G>T | p.R2061S |              | D<br>(0.555) | D (0.577) | D (0.697) | D<br>(0.843) | D (0.453) | M (0.640) | T (0.488) | T (0.613) | T<br>(0.571) |

PP2: PolyPhen2, MutTaser: Mutation Taser, MutAssessor: Mutation Assessor, D: probably damaging or deleterious or disease causing, P: possibly damaging, T: tolerated, B: benign, H: high, M: medium, L: low, N: neutral
